# Supplementary material for: Harbinger transposon insertion in ethylene signaling gene leads to emergence of new sexual forms in cucurbits
Source: PubMed Central journal article supplement (PMC11161486; doi:10.1038/s41467-024-49250-9), 2024-06-07
Supplement: 41467_2024_49250_MOESM1_ESM.pdf [file 41467_2024_49250_MOESM1_ESM.pdf]

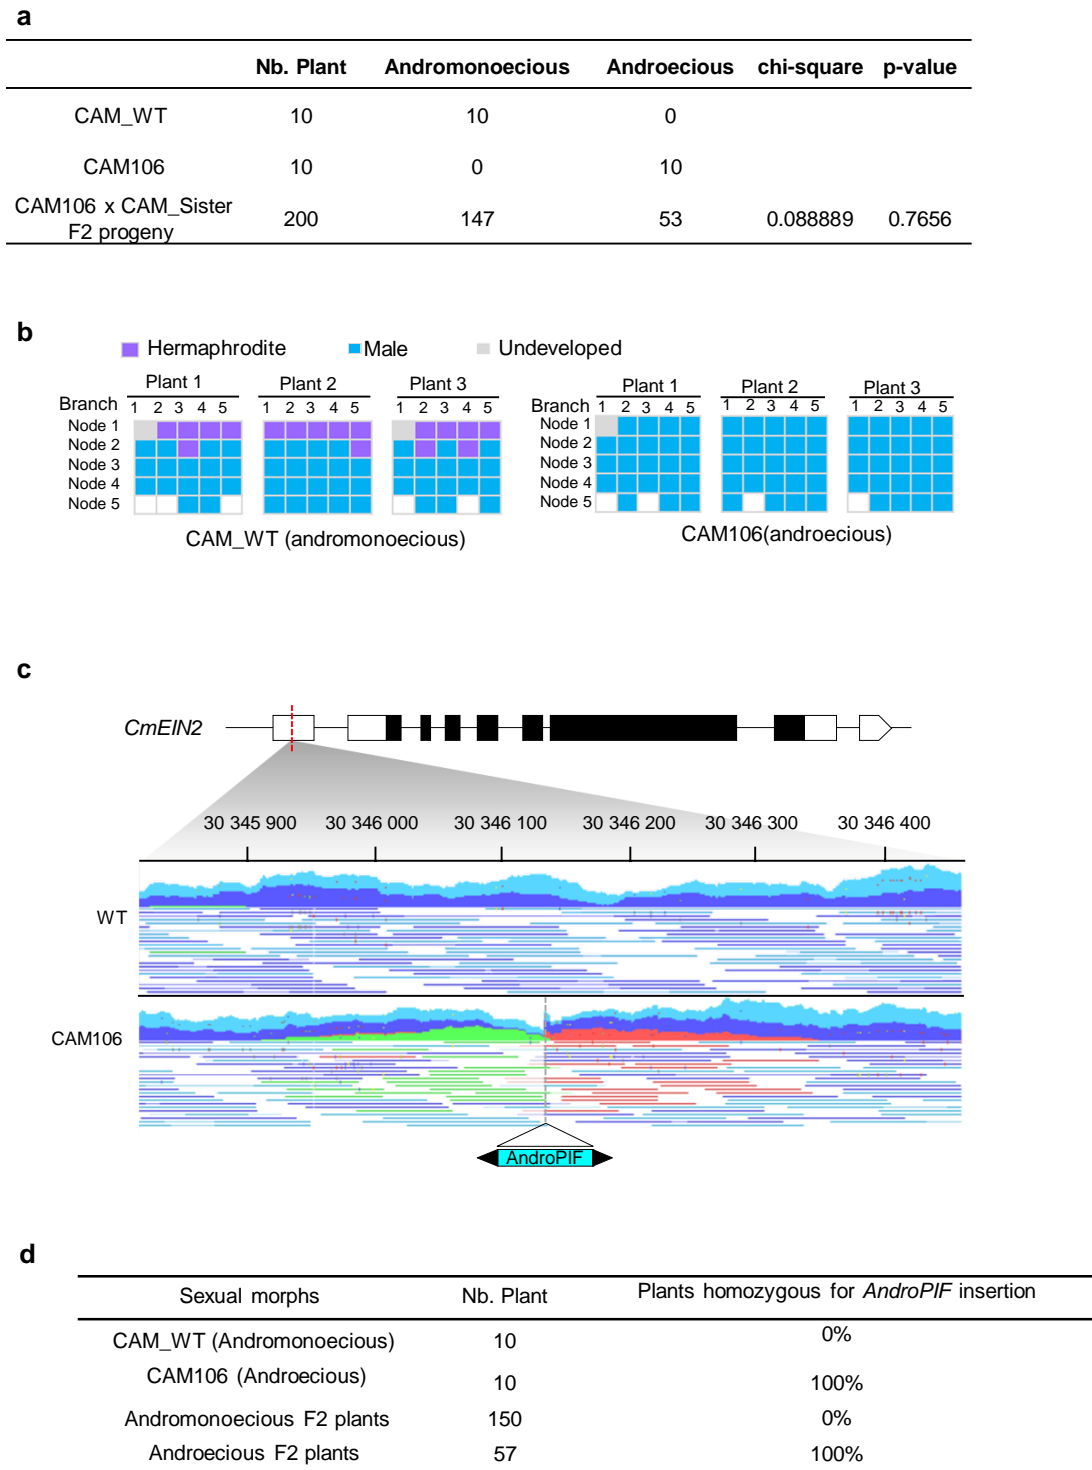

**Figure S1. Sexual morphs observed in androecious *CAM106* spontaneous mutant and andromonoecious *CAM\_WT* line.**

**a** Segregation analysis of sexual morphs in *CAM\_WT* x *CAM106* F2 progeny. Nb, total number of plants. **b** Graphic presentation of flower sexual types observed in *CAM\_WT* and in *CAM106* lines. **c** Screenshot of CLC Genomics Workbench software showing the insertion of *AndroPIF* into 5' UTR of *CmEIN2*. Discordant reads are shown in green and red color while paired reads are shown in blue and purple. **d**, PCR screening for *AndroPIF* insertion in F2 plants, described in a, and plants harboring recombination linked to *a3*.

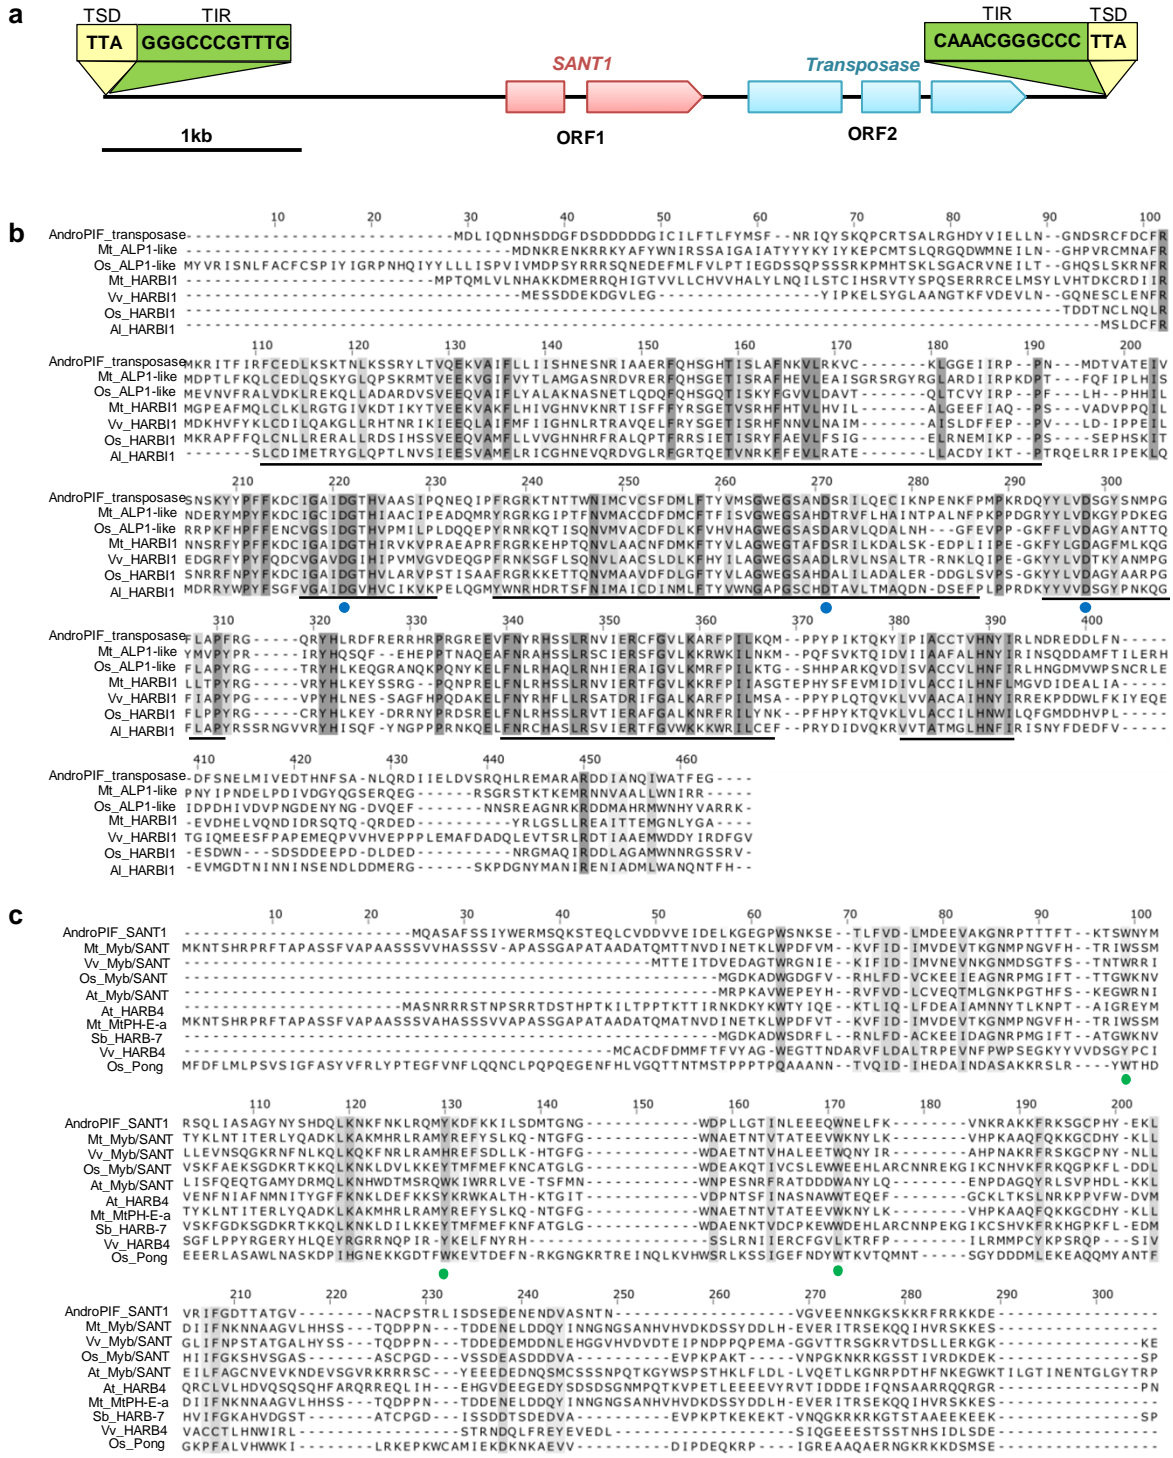

**Figure S2. *AndroPIF* is a class II DNA transposon encoding 2 ORFs, SANT1 and Transposase.**

**a** Structural representation and annotation of the *AndroPIF* transposon inserted at the *CmEIN2* locus. Picture is scaled. The 3 bp Target Site Duplication (TSD), and the Terminal Inverted Repeats (TIR) are shown. **b** Amino-acids sequence comparison of *AndroPIF* transposase, and ALP1 and HARB11 proteins of *M. truncatula* (Mt), *O. sativa* (Os), *V. vinifera* (Vv), and *A. lyrata* (Al). The conserved regions are underlined and the conserved DDD residuals are highlighted by blue dots. **c** Amino-acids sequence comparison of *AndroPIF* SANT1/Myb protein, and homologous proteins from *M. truncatula*, *V. vinifera*, *S. bicolor* (*Sb*), and *O. sativa*. The conserved W residuals are highlighted by green dots.

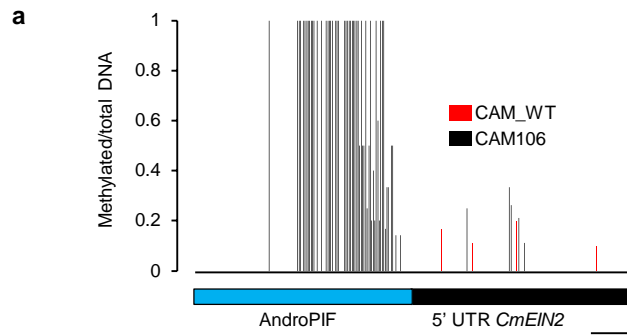

**b**

|                | Sequence context | Cytosine number | % of methylation |        |
|----------------|------------------|-----------------|------------------|--------|
|                |                  |                 | CAM_WT           | CAM106 |
| 500 bps before | CG               | 10              | 0.00%            | 0.00%  |
|                | CHG              | 19              | 0.00%            | 0.76%  |
|                | CHH              | 131             | 0.15%            | 0.34%  |
| 500 bps in     | CG               | 10              | 0.00%            | 28.57% |
|                | CHG              | 32              | 0.00%            | 65.91% |
|                | CHH              | 99              | 0.00%            | 40.91% |
| 500 bps after  | CG               | 12              | 1.11%            | 10.53% |
|                | CHG              | 26              | 0.53%            | 0.43%  |
|                | CHH              | 127             | 0.21%            | 0.16%  |

**Figure S3. DNA methylation analysis of *AndroPIF* and *CmEIN2* 5'UTR in CAM\_WT and CAM106 mutant**

**a** Bisulphite sequencing of 1kb region overlapping *AndroPIF* and *CmEIN2* 5'UTR. The percentage of methylated cytosine is indicated by vertical bars. **b** Percentage of methylated cytosine in CGN, CHG and CHH sequence context for the CAM\_WT and CAM106. Data on 500bps before, within and after *AndroPIF* insertion site is shown.

**a**

| Genotype        | Mutation location | Type of transcript    | Percentage of transcript | Predicted protein length (aa) |
|-----------------|-------------------|-----------------------|--------------------------|-------------------------------|
| WT              | -                 | -                     | 100%                     | 1291                          |
|                 |                   | Intron 3&4 retention  | 30%                      | 133                           |
| <i>ein2-SP1</i> | G1175A            | Intron 3 retention    | 47%                      | 172                           |
|                 |                   | Exon 4 skipping       | 23%                      | 1220                          |
| <i>ein2-SP2</i> | G1246A            | Intron 3 retention    | 27%                      | 172                           |
|                 |                   | Cryptic acceptor site | 73%                      | 172                           |

**b**

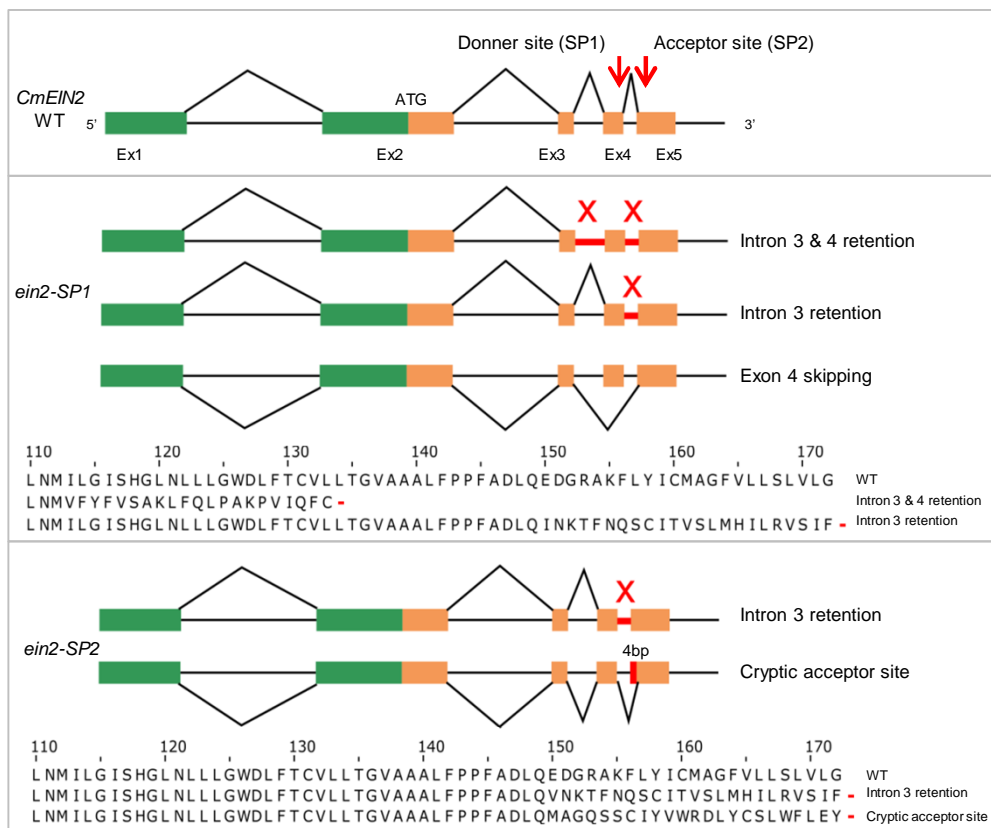

**Figure S4. Transcript forms of *CmEIN2* splicing mutant detected by reverse transcription PCR analysis**

**a** Splicing forms of *ein2-SP1* and *ein2-SP2* transcripts in percent. Transcript variations were detected by reverse transcription PCR analysis of leaf mRNAs. The splicing forms were validated by Sanger sequencing, and quantification was carried out using imageJ analysis. **b** Schematic representations of the splicing forms, and predicted protein sequences. Red arrow indicated the mutations located in donor (*ein2-SP1*) and acceptor site (*ein2-SP2*).

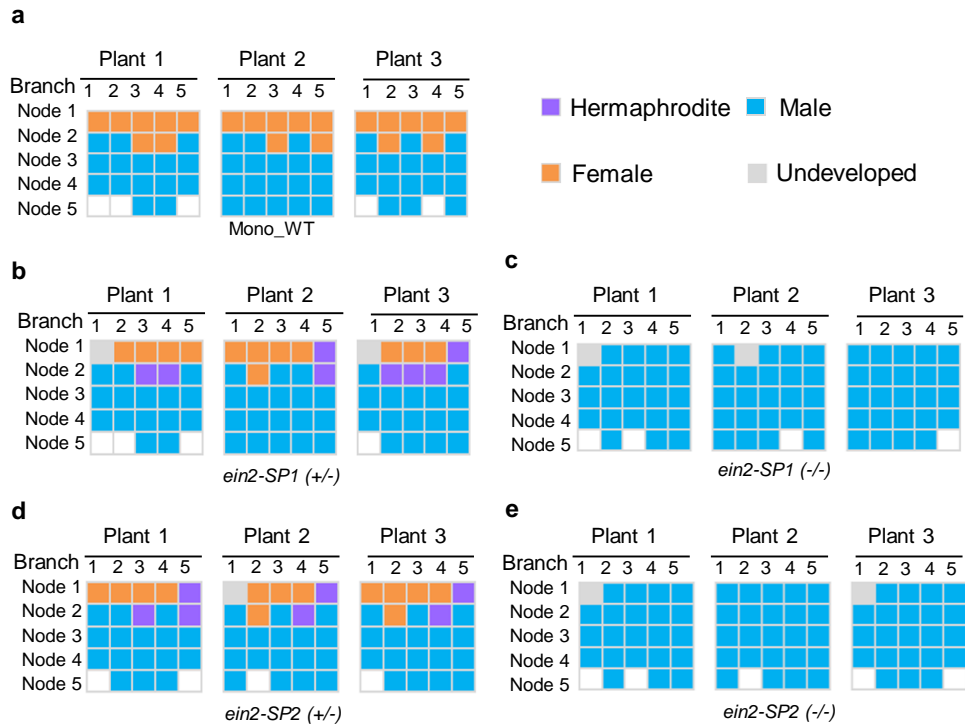

**Figure S5. Sexual morphs observed in *CmEIN2* TILLING mutants.**

Graphic presentation of flower sexual types observed in wildtype monoecious melon (**a**), heterozygous *ein2-SP1 (+/-)* mutant (**b**), homozygous *ein2-SP1 (-/-)* mutant (**c**), heterozygous *ein2-SP2 (+/-)* mutant (**d**), and homozygous *ein2-SP2 (-/-)* mutant (**e**).

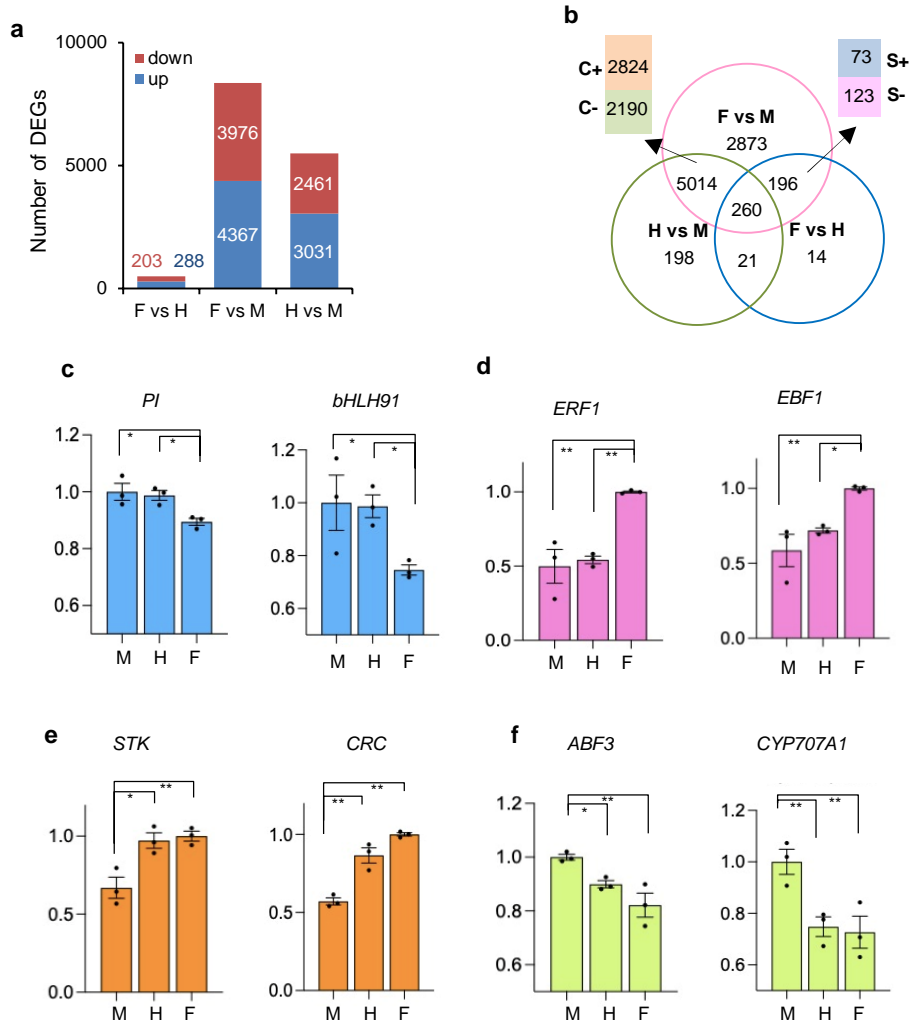

**Figure S6 Transcriptome analysis of female, hermaphrodite and males flowers**

**a** Number of differentially expressed genes (DEGs) in pairwise comparison groups. F, female (*wip1*), H, hermaphrodite (*wip1 ein2* double mutant), M, males (*acs7/ ein2* double mutant) flowers. **b** Venn diagram showing overlap between the pairwise comparison groups. **c-f** qPCR analysis of selected candidate genes associated with stamen development (**c**), S+; stamen inhibition (**d**), S-; carpel development (**e**), C+; and carpel inhibition (**f**), C-. Data are mean  $\pm$  SE, \*P < 0.05, \*\*P < 0.01, two-way ANOVA (with Tukey's post hoc test). M, Male flowers; H, hermaphrodite flowers; F, Female flowers. n= 3 biological replicates.

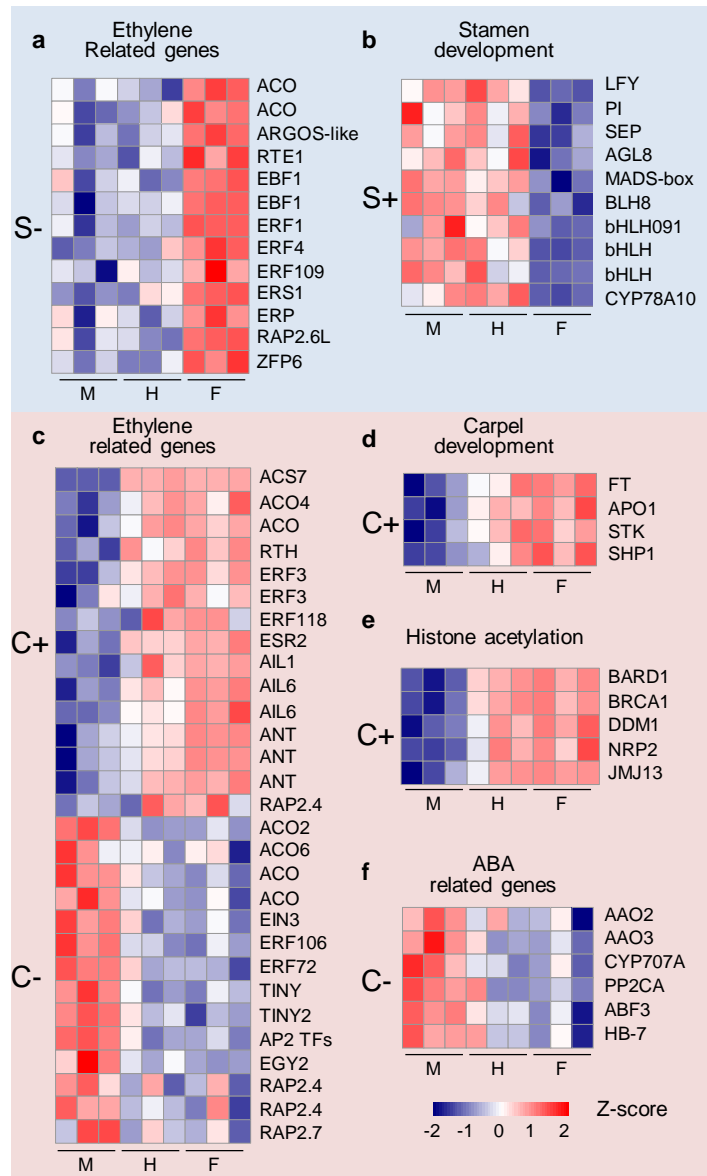

**Figure S7. Differential gene expression analysis between female (*wip1*), hermaphrodite (*wip1/ein2*) and male (*acs7/ein2*) flowers.** **a** Heat maps of E- ethylene-related genes differentially expressed in female compared to hermaphrodite and male flowers. The  $z$ -score scale represents mean-subtracted regularized log-transformed read counts. **b** Heat maps of E+ genes differentially expressed in female compared to hermaphrodite and male flowers. **c** Heat maps of C+ (up) and C- (down) ethylene-related DEGs expressed in male compared to hermaphrodite and female flowers. **d** Heat maps of C+ DEGs expressed in male compared to hermaphrodite and female flowers. **e** Heat maps of C+ brassinosteroid related DEGs expressed in male compared to hermaphrodite and female flowers. **f** Heat maps of C- ABA related DEGs expressed in male compared to hermaphrodite and female flowers.

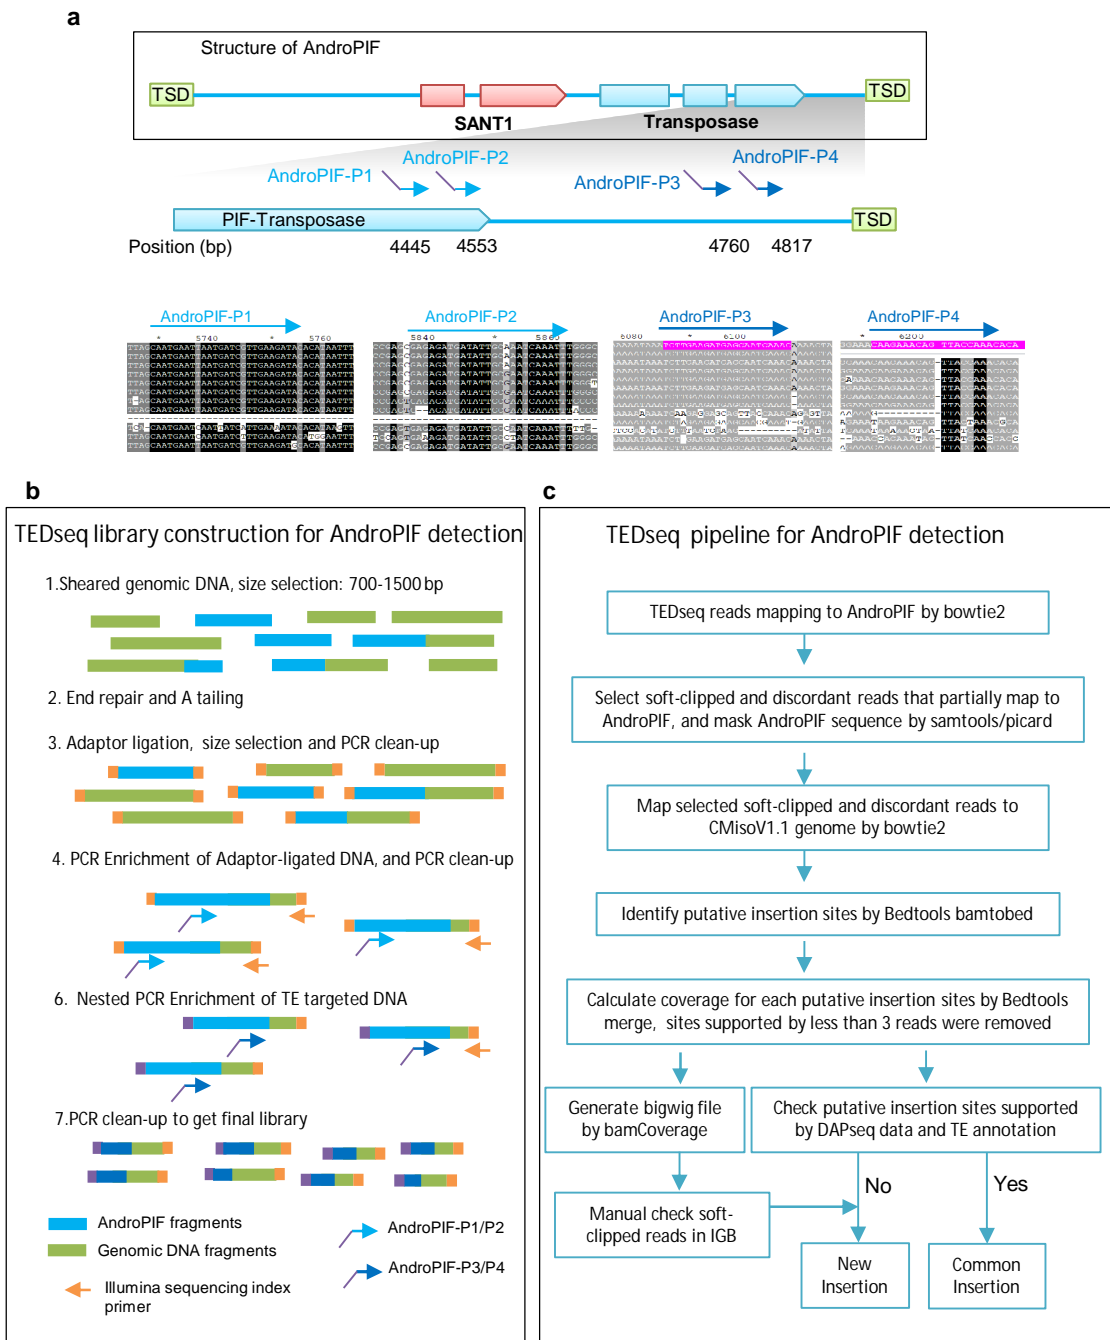

**Figure S8. Process of TEDseq analysis of AndroPIF related elements**

a Schematic diagram of primer design for AndroPIF capture TEDseq. b TEDseq library construction for AndroPIF detection in melon genomes. c TEDseq pipeline for AndroPIF detection.



**a**

| replication | Percent of reads mapping to <i>androPIF</i> reference sequence | Percent of split-clipped and discordant-pair reads mapping to Mono genome | Number of detected PILs | Number of PILs identified in rep1 and rep2 | Reads of <i>AndroPIF</i> inserted in <i>CmEIN2</i> |
|-------------|----------------------------------------------------------------|---------------------------------------------------------------------------|-------------------------|--------------------------------------------|----------------------------------------------------|
| rep1        | 71.40%                                                         | 95.58%                                                                    | 367                     | 341                                        | 10                                                 |
| rep2        | 70.24%                                                         | 97.14%                                                                    | 496                     |                                            | 24                                                 |

**b**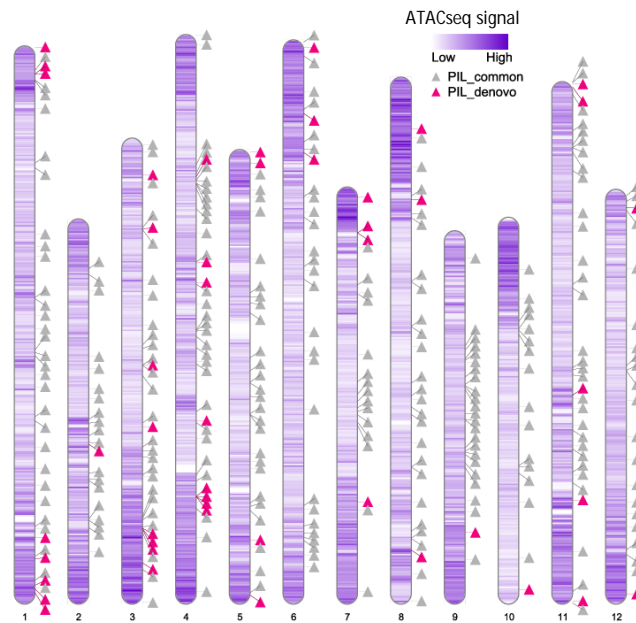**c**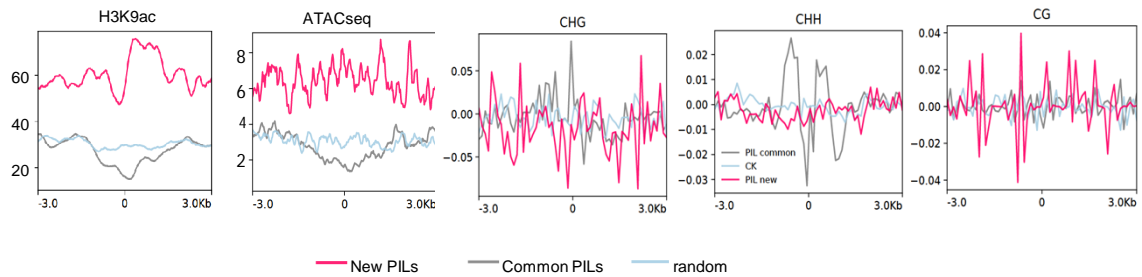**Figure S9. Data summary of TED-seq and associated chromatin features**

**a** TED-seq data summary. AndroPIF insertion in EIN2 5'UTR was used as a positive control. Rep1 and rep2, are two independent assays using a pool of 50 CAM plants plus CAM106 as control. **b** Genomic positions of PILs and ATACseq signal density. **c** Level of H3K9ac, ATACseq, and DNA methylation in CHG, CHH, and CG context, in  $\pm 3$ kb sequences flanking insertion sites of Common PIFs, new PIFs, and random genomic regions (random).

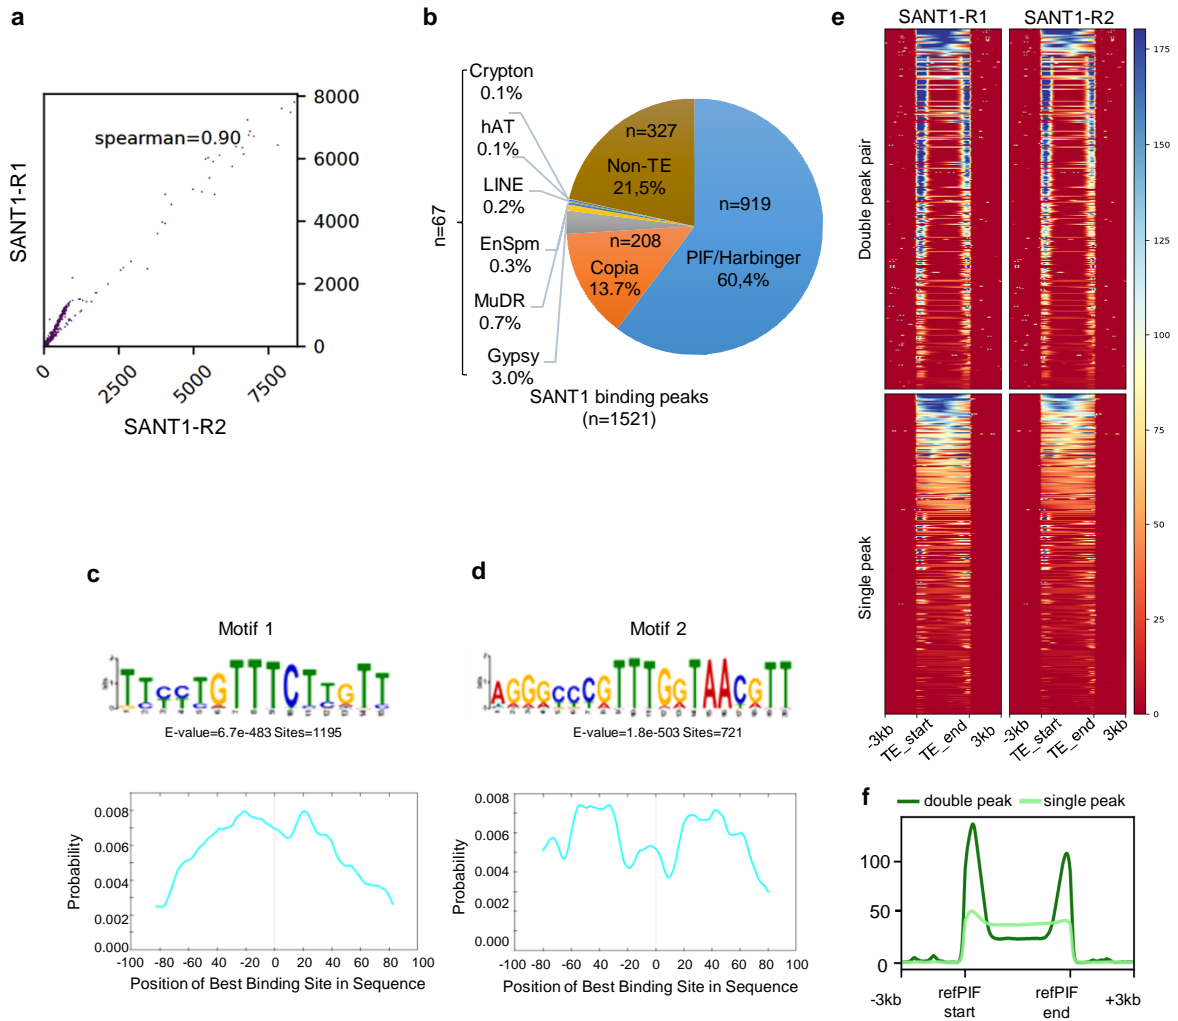

**Figure S10. Data summary of SANTI DAPseq analysis**

**a** RPKM scatter plot, showing correlation between R1 and R2 SANTI1 ampDAPseq assays. Spearman correlation coefficient is indicated on the plot. **b** Sequence annotation of SANTI1-binding sites displayed in percent. **c,d** Top motifs enriched in SANTI1 binding sites, and CentriMo plots highlighting the position of the motifs relative to the summit of SANTI1 binding peaks. **e,f** Heatmap (e) and metaplot (f) showing SANTI1 binding signals relative to Reference PIF loci

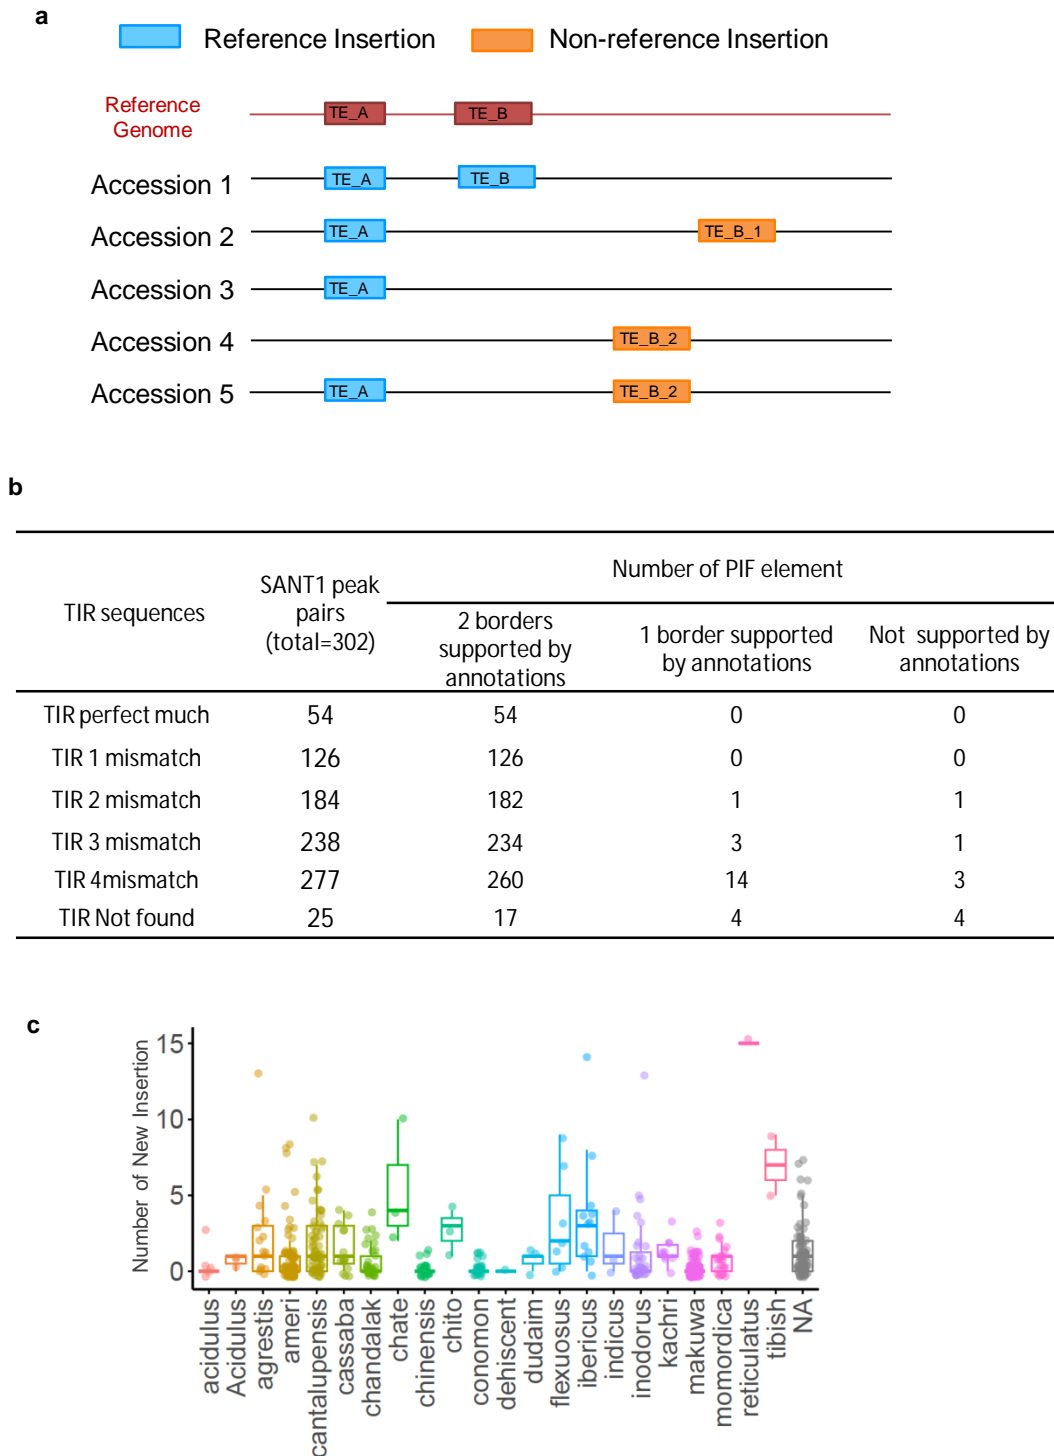

**Figure S11. *AndroPIF* elements polymorphism analysis based on reference and non-reference TE insertions**

**a** Schematic diagram of reference and non-reference *PIF/Harbinger* insertions. **b** Summary of the number of reference *androPIF* elements identified by *in silico* analysis, or manually annotated, by searching TIR sequences within SANT1 DAPseq peaks. The analysis allow 1 to 4 mismatches in ‘GGGCCCGTTG’, androPIF reference TIR sequence. A total of 182 *androPIF* elements were identified, and classified as full length PIF. **c** Number of new insertion per accession in different melon botanical groups.

**Supplementary Table S1: EMS-induced TILLING mutations in *CmEIN2***

| Mutations in gDNA | Mutations in cDNA | Type of Mutations | AA changes | Phenotypes  |
|-------------------|-------------------|-------------------|------------|-------------|
| G1175A            | -                 | Splicing          |            | Androecious |
| G1246A            | -                 | Splicing          |            | Androecious |
| C2518T            | C1324T            | Missense          | L442F      | Monoecious  |
| C2570T            | C1376T            | Missense          | T459I      | Monoecious  |
| G2854A            | G1660A            | Missense          | E554K      | Monoecious  |
| G3118A            | G1924A            | Missense          | G642R      | Monoecious  |
| C3155T            | C1960T            | Missense          | L654F      | Monoecious  |
| G3159A            | G1964A            | Missense          | S655T      | Monoecious  |
| G3490A            | G2296A            | Missense          | D766N      | Monoecious  |
| G3601A            | G2407A            | Missense          | V803I      | Monoecious  |
| G3643A            | G2449A            | Missense          | D817N      | Monoecious  |
| G3713A            | G2519A            | Missense          | G840D      | Monoecious  |
| C3865T            | C2671T            | Missense          | L891F      | Monoecious  |
| C3971T            | C2777T            | Missense          | S926F      | Monoecious  |
| G4417A            | G3223A            | Missense          | E1075K     | Monoecious  |
| C4536T            | C3341T            | Missense          | S1114F     | Monoecious  |
| C5282A            | C3521T            | Missense          | P1174L     | Monoecious  |
| G5486A            | C3725T            | Missense          | A1242V     | Monoecious  |
| G5515A            | G3754A            | Missense          | E1252K     | Monoecious  |

**Supplementary Table S2:** List of primers used in this study.

| Name                                   | Sequence                                                                                                                                      | Purpose             |
|----------------------------------------|-----------------------------------------------------------------------------------------------------------------------------------------------|---------------------|
| Chr8_3820_F                            | GTCTAATTATTAATAGTAAACAATACCATG                                                                                                                | Positional cloning  |
| Chr8_3820_R                            | GTAAAATTGGTCAAATGGTGTCTGATG                                                                                                                   | Positional cloning  |
| Chr8_1725_F                            | GCTTTACGAAAGAAAAGGATAGCAAGC                                                                                                                   | Positional cloning  |
| Chr8_1725_R                            | GTGTATAAAACATCTTGGAAGGGTGAG                                                                                                                   | Positional cloning  |
| Chr8_2871_F                            | GATCGTTTGTCAAAGTTACACGATCATTAG                                                                                                                | Positional cloning  |
| Chr8_2871_R                            | GTCCCTTACTGGGTATATCTTATACTCAC                                                                                                                 | Positional cloning  |
| Chr8_6571_F                            | GTGAGCACCTTCCCCGCTAGTAATCCGAGTG                                                                                                               | Positional cloning  |
| Chr8_6571_R                            | CAATTCTCCCATTTCCTACTCTGCTTTC                                                                                                                  | Positional cloning  |
| Chr8_4840_F                            | CATCTGACTTTAATGGACCAAGAAAGC                                                                                                                   | Positional cloning  |
| Chr8_4840_R                            | CGACGATCCATTATAGTGGAGGATCCAT                                                                                                                  | Positional cloning  |
| Chr8_7220_F                            | TGGTGTGGTGTGCTAAATGGTTGCTTCTTAGT                                                                                                              | Positional cloning  |
| Chr8_7220_R                            | TGAAGCCTCCAAAGCAACTAGTGAATTAAGGT                                                                                                              | Positional cloning  |
| EIN2-qPCR-5UTR -F                      | AAGCCAATACGAAAACCCAGGTCAT                                                                                                                     | Quantitative RT-PCR |
| EIN2-qPCR-5UTR-R                       | AGAGACGATCAGGAATAGCTGTTTT                                                                                                                     | Quantitative RT-PCR |
| CmACS7 qPCR F2                         | CCTTACTATCCTGGATTTGACAGAGA                                                                                                                    | Quantitative RT-PCR |
| CmACS7 qPCR R2                         | TGGAGCGTTGGATCGTTGCTC                                                                                                                         | Quantitative RT-PCR |
| Cm_GENE-A_F                            | GAAAGAGGAGATTGATGTTGGAGT                                                                                                                      | Quantitative RT-PCR |
| Cm_GENE-A_R                            | TTCAAAGATGCCTCATATCCAC                                                                                                                        | Quantitative RT-PCR |
| CmWIP1F                                | TAGGGCTTCCAACCTTCTCTT                                                                                                                         | Quantitative RT-PCR |
| CmWIP1R                                | CTTGCAATTGATGGGTGTGATCTTCTTG                                                                                                                  | Quantitative RT-PCR |
| CmAct2_qPCR_F                          | ATTCTTGCATCTCTAAGTACCTTCC                                                                                                                     | Quantitative RT-PCR |
| CmAct2_qPCR_R                          | CCAATAAAGGGAAATAAATCACC                                                                                                                       | Quantitative RT-PCR |
| SANT_exon12_2-F                        | GCAATGGAATGAGCTTTTTAAGGTG                                                                                                                     | Quantitative RT-PCR |
| SANT_exon2-R                           | CTTCAACACCAACGTTTGTGTTGCTT                                                                                                                    | Quantitative RT-PCR |
| Tpase_exon1-F                          | CTCTAGCTTTTAAACAAGGTTTTGAGG                                                                                                                   | Quantitative RT-PCR |
| Tpase_exon12-R                         | CCATCAATAGCACCAATACAATCCTT                                                                                                                    | Quantitative RT-PCR |
| attb1_SANT1_F1                         | GGGGACAAGTTTGTACAAAAAAGCAGGCTTCA<br>TGTCACAAAAATCAACTGAACAAC                                                                                  | DAPseq              |
| attb2R_SANT1_R1                        | GGGGACCACTTTGTACAAGAAAGCTGGGTCCT<br>AAAGACTATTTATGAAATCTCTC                                                                                   | DAPseq              |
| AndroPIF-P1                            | <u>AATGATACGGCGACCACCGAGATCTACACTCT</u><br><u>TTCCCTACACGACGCTCTTCCGATCTCAATGAA</u><br>TTAATGATCGTTGAAGAT (Adaptor sequence is<br>underlined) | TEDseq              |
| AndroPIF-P2                            | <u>AATGATACGGCGACCACCGAGATCTACACTCT</u><br><u>TTCCCTACACGACGCTCTTCCGATCTGAGAGAT</u><br>GATATTRYVAATCAAATTT                                    | TEDseq              |
| AndroPIF-P3                            | <u>AATGATACGGCGACCACCGAGATCTACACTCT</u><br><u>TTCCCTACACGACGCTCTTCCGATCTTCTTGAA</u><br>GATGAGCAATCAAACAA                                      | TEDseq              |
| AndroPIF-P4                            | <u>AATGATACGGCGACCACCGAGATCTACACTCT</u><br><u>TTCCCTACACGACGCTCTTCCGATCTCAAGAAA</u><br>CAGTTACCAAACACATT                                      | TEDseq              |
| Illumina P7 sequencing<br>index primer | 5'-CAAGCAGAAGACGGCATACGAGATXXXXXX<br>GTGACTGGAGTTCAGACGTGTGCTCTTCCGATC<br>-s-T-3' (XXXXXX is specific sequencing index)                       | TEDseq              |
