# Supplementary material for: Harbinger transposon insertion in ethylene signaling gene leads to emergence of new sexual forms in cucurbits
Source: PubMed Central journal article supplement (PMC11161486; doi:10.1038/s41467-024-49250-9), 2024-06-07
Supplement: 41467_2024_49250_MOESM3_ESM.pdf [file 41467_2024_49250_MOESM3_ESM.pdf]

## **Description of Additional Supplementary Files**

**Supplementary Data 1:** DEGs list identified by RNAseq

**Supplementary Data 2:** PILs identified by TEDseq

**Supplementary Data 3:** SANT1 binding sites identified by DAPseq

**Supplementary Data 4:** RefPIFs annotated in Mono genome

**Supplementary Data 5:** Annotated intact AndroPIFs

**Supplementary Data 6:** Summary of the sampled collection of melon accessions used for AndroPIF insertion analysis
